# Supplementary material for: Coupling effect of molecular weight and crosslinking kinetics on the formation of rubber nanoparticles and their agglomerates in EPDM/PP TPVs during dynamic vulcanization
Source: Royal Society of Chemistry journal article supplement (doi:10.1039/c9sm02059d), 2019-11-27
Supplement: c9sm02059d1.pdf [file c9sm02059d1.pdf]

## Supplementary materials

### Coupling effect of molecular weight and crosslinking kinetics on the formation of rubber nanoparticles and their agglomerates in EPDM/PP TPVs during dynamic vulcanization

Shangqing Li<sup>a, b</sup>, Hongchi Tian<sup>b</sup>, Hanguang Wu, Nanying Ning<sup>a, b, c \*</sup>, Ming Tian<sup>a, b, c \*</sup>, and Liquan Zhang<sup>a, b, c</sup>

<sup>a</sup> Beijing Advanced Innovation Center for Soft Matter Science and Engineering, Beijing University of Chemical Technology, Beijing, China.

<sup>b</sup> State Key Laboratory of Organic-Inorganic Composites, Beijing University of Chemical Technology, Beijing 100029, China.

<sup>c</sup> Key Laboratory of Beijing City on Preparation and Processing of Novel Polymer Materials, Beijing University of Chemical Technology, Beijing 100029, China.

\* Corresponding authors. Tel.: 86 10 64456158; Fax: 86 10 64456158.

E-mail addresses: [tianm@mail.buct.edu.cn](mailto:tianm@mail.buct.edu.cn) (Prof. Tian) and [ningny@mail.buct.edu.cn](mailto:ningny@mail.buct.edu.cn) (Prof. Ning).

**Table S1** Characteristic properties of pure polymers

| Polymers | Trade mark | Characteristic properties of pure polymers |                              |                                |                                                                              |            |                  |             |
|----------|------------|--------------------------------------------|------------------------------|--------------------------------|------------------------------------------------------------------------------|------------|------------------|-------------|
|          |            | Density (g/cm <sup>3</sup> )               | $M_w$ (g·mol <sup>-1</sup> ) | $MFI$ (g·10min <sup>-1</sup> ) | $ML_{(1+4)}^{125\text{ }^{\circ}\text{C}}$ Pa <sup>-1</sup> ·s <sup>-1</sup> | $T_m$ (°C) | Ethylene content | ENB content |
| EPDM     | 3080L      | 1.02                                       | ~860,000                     | —                              | 70                                                                           | —          | 70%              | 3.5%        |
| PP       | HP500D     | 0.91                                       | ~623,300                     | 0.5                            | —                                                                            | 170        | —                | —           |
| PP       | K1118      | 0.89                                       | ~271,900                     | 7.8                            | —                                                                            | 160        | —                | —           |

\*At 230 °C and 2.16 kg;  $M_w$ : Molecular weight;  $MFI$ : Melt flow index;  $ML$ : Mooney viscosity;  $T_m$ : Melt temperature; ENB: 5-ethylidene-2-norbornene.

**Table S2** Formulas of neat EPDM with various crosslinking systems for static curing characteristic.

| Components            | E/C <sub>1</sub> /AC <sub>1</sub> -1 (H <sub>CR</sub> L <sub>CD</sub> ) | E/C <sub>1</sub> /AC <sub>1</sub> -2 (H <sub>CR</sub> M <sub>CD</sub> ) | E/C <sub>2</sub> /AC <sub>2</sub> (L <sub>CR</sub> H <sub>CD</sub> ) |
|-----------------------|-------------------------------------------------------------------------|-------------------------------------------------------------------------|----------------------------------------------------------------------|
| EPDM (g)              | 60                                                                      | 60                                                                      | 60                                                                   |
| Phenolic resin (g)    | —                                                                       | —                                                                       | 1.12                                                                 |
| SnCl <sub>2</sub> (g) | —                                                                       | —                                                                       | 0.2                                                                  |
| TBPA (g)              | 0.62                                                                    | 1.86                                                                    | —                                                                    |
| TMPTMA (g)            | 0.27                                                                    | 0.81                                                                    | —                                                                    |

| Table S3          |                                    | Different codes of                           |         |         |         |                               |
|-------------------|------------------------------------|----------------------------------------------|---------|---------|---------|-------------------------------|
| the five selected | Blends                             | Codes of the five selected samples during DV |         |         |         |                               |
| blend system      |                                    |                                              |         |         |         | samples for each<br>during DV |
|                   | PH-L <sub>CR</sub> H <sub>CD</sub> | $A_1^H$                                      | $B_1^H$ | $C_1^H$ | $D_1^H$ | $E_1^H$                       |
|                   | PL-L <sub>CR</sub> H <sub>CD</sub> | $A_1^L$                                      | $B_1^L$ | $C_1^L$ | $D_1^L$ | $E_1^L$                       |
|                   | PH-H <sub>CR</sub> M <sub>CD</sub> | $A_2^H$                                      | $B_2^H$ | $C_2^H$ | $D_2^H$ | $E_2^H$                       |
|                   | PL-H <sub>CR</sub> M <sub>CD</sub> | $A_2^L$                                      | $B_2^L$ | $C_2^L$ | $D_2^L$ | $E_2^L$                       |
|                   | PH-H <sub>CR</sub> L <sub>CD</sub> | $A_3^H$                                      | $B_3^H$ | $C_3^H$ | $D_3^H$ | $E_3^H$                       |
|                   | PL-H <sub>CR</sub> L <sub>CD</sub> | $A_3^L$                                      | $B_3^L$ | $C_3^L$ | $D_3^L$ | $E_3^L$                       |

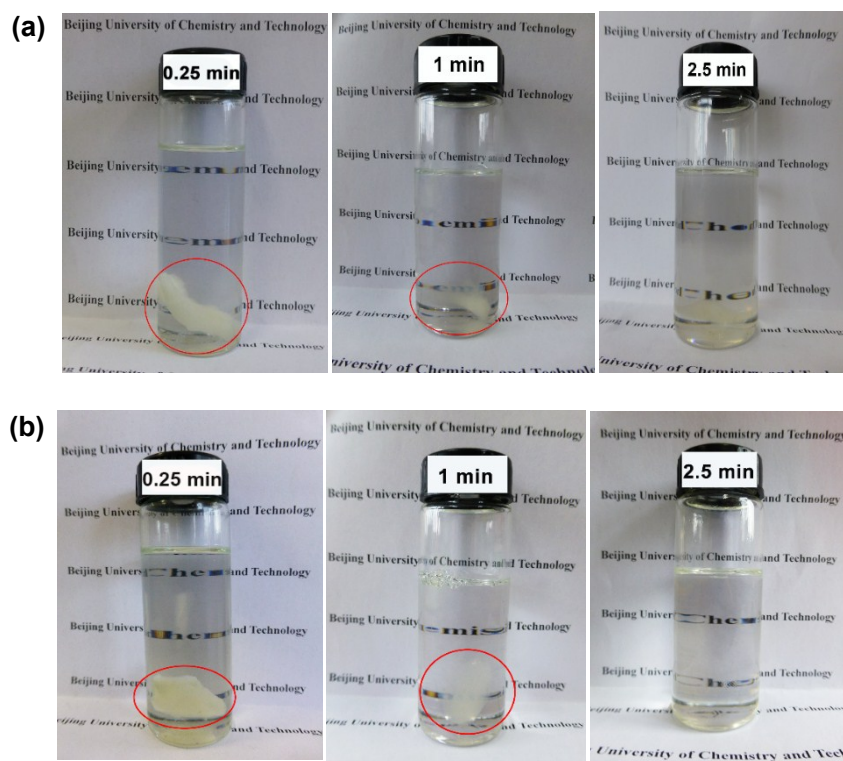

**Fig. S1** Photographs of disintegration test of different EPDM/PP (60/40) blends obtained at various DV times in hot xylene at 120 °C: (a) PH-H<sub>CR</sub>L<sub>CD</sub>; (b) PL-H<sub>CR</sub>L<sub>CD</sub>.

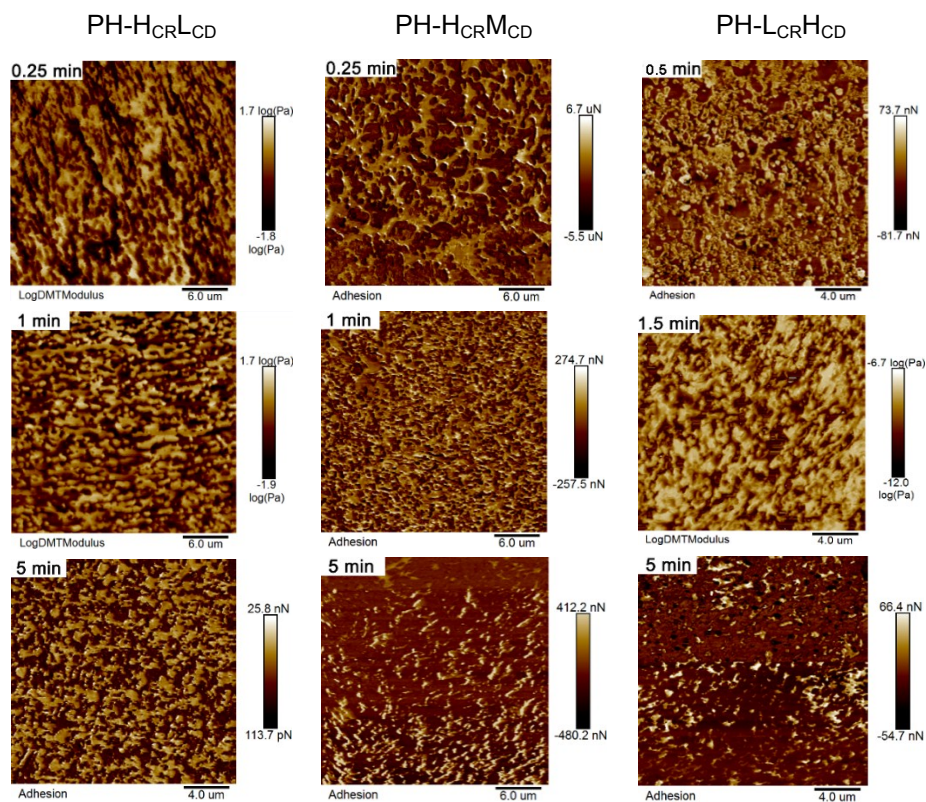

**Fig. S2** AFM images of EPDM/PH blends prepared at different crosslinking conditions under various DV times. (The darker regions represent PP phase, and the lighter regions represent EPDM rubber phases)

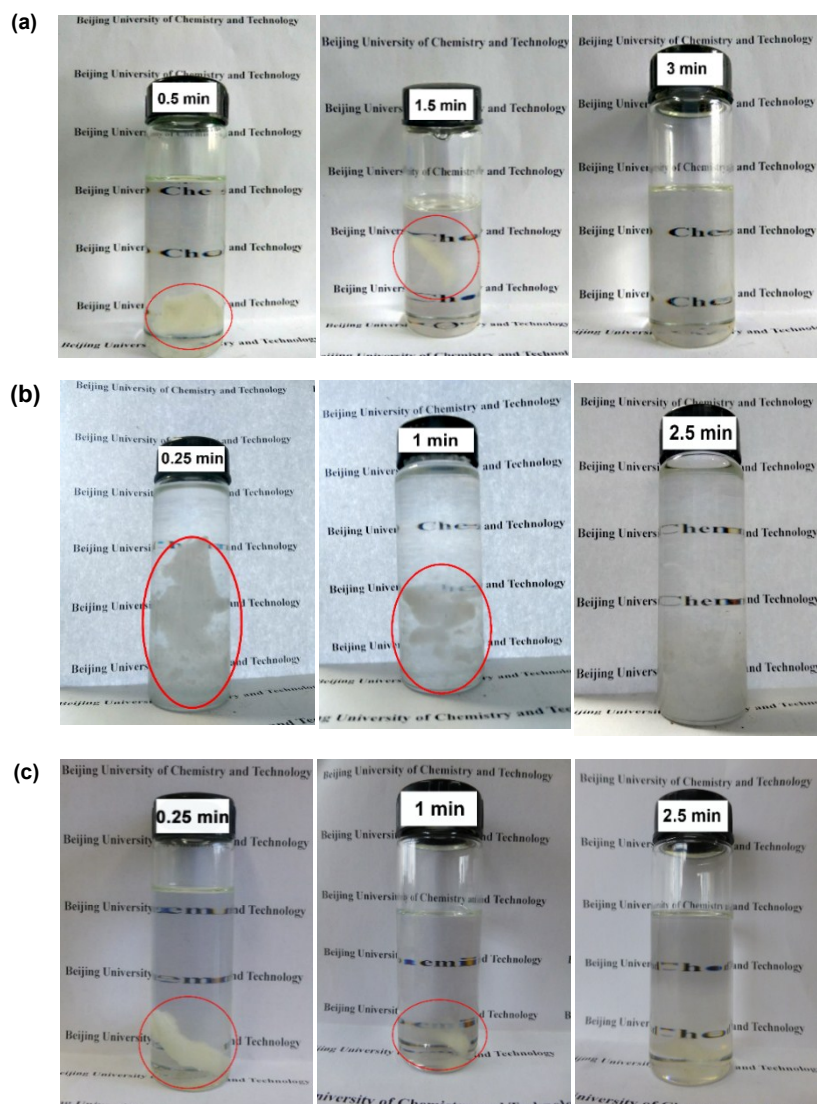

**Fig. S3** Photographs of disintegration test of different EPDM/PP (60/40) blends obtained at various DV times in hot xylene at 120 °C: (a) PH-L<sub>CR</sub>H<sub>CD</sub>; (b) PH-H<sub>CR</sub>M<sub>CD</sub>; (c) PH-H<sub>CR</sub>L<sub>CD</sub>.
